1 **Pharmaceutical Payments to Japanese Board-Certified Infectious Disease**

2 **Specialists: A Four-year Retrospective Analysis of Payments from 92**

3 **Pharmaceutical Companies between 2016 and 2019**

4

5 **Authors:**

6 Anju Murayama<sup>1,2,\*,†</sup>; Sae Kamamoto<sup>1,3</sup>; Kohki Yamada<sup>1</sup>; Divya Bhandari, MSH<sup>1</sup>; Iori

7 Shoji<sup>1</sup>; Hanano Mamada<sup>1</sup>; Moe Kawashima<sup>1</sup>; Erika Yamashita<sup>1</sup>; Hiroaki Saito, MD,

8 PhD<sup>4</sup>; Eiji Kusumi, MD<sup>5</sup>; Toyoaki Sawano, MD, PhD<sup>6</sup>; Binaya Sapkota<sup>7</sup>; Tetsuya

9 Tanimoto, MD<sup>1,8</sup>; Akihiko Ozaki, MD, PhD<sup>1,9</sup>

10

11 **Affiliations:**

12 <sup>1</sup>Medical Governance Research Institute, Minato-ku, Tokyo, Japan

13 <sup>2</sup>Tohoku University School of Medicine, Sendai city, Miyagi, Japan

14 <sup>3</sup>Hamamatsu University School of Medicine, Hamamatsu, Shizuoka, Japan

15 <sup>4</sup>Department of Gastroenterology, Sendai Kosei Hospital, Sendai City, Miyagi, Japan

16 <sup>5</sup>Navitas Clinic Shinjuku, Shinjuku-ku, Tokyo, Japan

17 <sup>6</sup>Department of Surgery, Jyoban Hospital of Tokiwa Foundation, Iwaki City, Fukushima,

18 Japan

19 <sup>7</sup>Nobel College Faculty of Health Sciences, affiliated to Pokhara University, Kathmandu,

20 Nepal

21 <sup>8</sup>Department of Internal Medicine, Navitas Clinic, Tachikawa City, Tokyo, Japan

22 <sup>9</sup>Department of Breast Surgery, Jyoban Hospital of Tokiwa Foundation, Iwaki City,

23 Fukushima, Japan

24

## 25 **Correspondence**

26 Anju Murayama

27 Medical Governance Research Institute, Minato-ku, Tokyo, 1087505, Japan

28 Telephone: 81-90-6321-6996

29 Email address: [ange21tera@gmail.com](mailto:ange21tera@gmail.com)

30

## 31 **Conflicts of interest:**

32 Dr. Saito received personal fees from TAIHO Pharmaceutical Co. Ltd outside the scope

33 of the submitted work. Dr. Kusumi received personal fees from Otsuka Pharmaceutical

34 outside the scope of the submitted work. Drs. Ozaki and Tanimoto received personal

35 fees from Medical Network Systems outside the scope of the submitted work. Dr.

36 Tanimoto also received personal fees from Bionics Co. Ltd, outside the scope of the

37 submitted work. Regarding non-financial conflicts of interest among the study authors,  
38 all are engaged in ongoing research examining financial and non-financial conflicts of  
39 interest among healthcare professionals and pharmaceutical companies in Japan.  
40 Individually, Anju Murayama, Hiroaki Saito, Toyoaki Sawano, Tetsuya Tanimoto, and  
41 Akihiko Ozaki have contributed to several published studies addressing conflicts of  
42 interest and quality of evidence among clinical practice guideline authors in Japan and  
43 the United States. The other authors have no example of conflicts of interest to disclose.

44

#### 45 **Funding sources:**

46 This study was funded in part by the Medical Governance Research Institute. This non-  
47 profit enterprise receives donations from Ain Pharmacies, Inc., a dispensing pharmacy,  
48 other organizations, and private individuals. This study also received support from the  
49 Tansa (formerly known as the Waseda Chronicle), an independent non-profit news  
50 organization dedicated to investigative journalism. None of the entities providing  
51 financial support for this study contributed to the design, execution, data analyses, or  
52 interpretation of study findings and the drafting of this manuscript.

53

54



## 56    **Abstract**

### 57    **Objective**

58    Conflict of interest with pharmaceutical companies is one of the most contentious issues  
59    in infectious diseases. However, there is a lack of whole picture of detailed payments in  
60    Japan.

61

### 62    **Study Design and Setting**

63    This retrospective study assessed financial relationships between pharmaceutical  
64    companies and all infectious disease specialists board-certified by the Japanese  
65    Association for Infectious Disease, using publicly disclosed payment data from 92  
66    pharmaceutical companies. Descriptive analyses were conducted for the payments.  
67    Payment trends were examined by the generalized estimating equations.

68

### 69    **Results**

70    Of 1614 board-certified infection disease specialists, 1,055 (65.4%) received a total of  
71    \$17,784,070 payments, corresponding to 21,680 cases between 2016 and 2019. The  
72    mean±SD and median (interquartile range: IQR) were \$16,857±\$45,010 and \$3,183  
73    (\$938–\$11,250) in payments. All board executive members of Japanese Association of

74 Infectious Disease received higher payments averaging \$163,792. There were no  
 75 significant changes in payments per specialist (annual change rate: -1.4% [95% CI: -  
 76 4.7%–2.3%],  $p=0.48$ ) and prevalence of specialists with payments (annual change rate: -  
 77 1.4% [95% CI: -3.1%–0.2%],  $p=0.093$ ) over the four years.

78

## 79 **Conclusion**

80 There were substantial financial relationships between pharmaceutical companies and  
 81 board-certified infectious disease specialists in Japan. Such personal payments must be  
 82 restricted to a certain level to avoid potential conflict of interest.

83    **Keywords:**

84    Board-Certified Infectious Disease Specialists, Pharmaceutical payments, Physician

85    payment, conflicts of interest, Health policy, Japan

86

87    **Running title:** Pharmaceutical Payments to Japanese Board-Certified Infectious

88    Disease Specialists

89

90    **Word count:** Abstract 197 words, Main text 3432 words

91

92 **Main text**

93 **Introduction**

94 There has been an increasing concern on financial relationships between healthcare  
95 professionals, healthcare organizations and pharmaceutical companies, which  
96 sometimes become conflicts of interest (COI), because of its potential bias on healthcare.

97 In response to this concern, many countries have started requesting pharmaceutical  
98 companies to disclose data on their donations and honoraria to healthcare professionals  
99 and healthcare organizations.[1, 2] Consequently, previous studies utilizing these data  
100 have demonstrated that there were substantial financial relationships between  
101 pharmaceutical companies.[3-7]

102

103 Among several specialties, infectious disease is one where there is a greatest concern  
104 about the influence from pharmaceutical companies. As in the case of Lyme disease  
105 guideline issued by the Infectious Diseases Society of America (IDSA), the guideline  
106 chair and authors manipulated the guideline recommendations and statements for the  
107 benefits of testing and insurance companies, leading to inadmissible harms on the  
108 patients in the US.[8]

109



110 In cases of Japan, 91.7% of authors of clinical guideline for methicillin-resistant  
 111 *Staphylococcus aureus* issued by the Japanese Association for Infectious Diseases  
 112 received an average of \$28,371 personal payments in 2016, and four pharmaceutical  
 113 companies' employees were involved in the guideline development.[9] Moreover,  
 114 during coronavirus disease 2019 (COVID-19) pandemic, substantial financial  
 115 relationships were uncovered among healthcare professionals specialized in infectious  
 116 diseases and pharmaceutical companies worldwide. However, the Japanese government  
 117 COVID-19 advisory board members did not manage to disclose the detailed  
 118 information on COI with pharmaceutical companies.[10] Although COI among  
 119 influential infectious disease experts such as television commentators specialized in  
 120 infectious diseases[11], guideline authors[7, 9], and government advisory members[10]  
 121 were investigated, the whole picture of financial relationships with pharmaceutical  
 122 companies remains to be elucidated. Since board-certified infectious disease specialists  
 123 directly prescribe drugs for patients, it is crucial to understand financial relationships  
 124 among pharmaceutical companies and those specialists.

125

126 This study aimed to elucidate the prevalence of board-certified infectious disease  
 127 specialists receiving payment from pharmaceutical companies, the magnitude of the

128 payments, and payments trend over last few years in Japan.

129

## 130 **Methods**

### 131 *Study design and participants*

132 This study was a retrospective analysis evaluating financial relationships among all  
133 board-certified infectious disease specialists and pharmaceutical companies in Japan.  
134 All infectious disease specialists who were board-certified by the Japanese Association  
135 for Infectious Disease (the Association hereafter) as of November 2021 were included in  
136 this study. The Association is the largest and most prestigious professional medical  
137 society for infectious diseases in Japan, which contributed to improve patient care by  
138 promoting research and training physicians for infectious diseases in Japan since its  
139 establishment in 1926. Also, the Association is the only organization in Japan that trains  
140 and certifies infectious diseases specialists in the country.

141 As of November 2021, the Association required physicians to complete several  
142 requirements to certificate them as infectious disease specialists, such as being a  
143 specialist certified by at least one of the 19 major Japanese medical societies[12],  
144 having completed at least six years of clinical practice training after having acquired a  
145 medical license and at least three years of specialized training in infectious diseases at

146 an institution accredited by the Association, and having published at least one academic  
147 article on a peer-review journal and at least two conference presentations as the first  
148 author.

149

### 150 *Data collection*

151 Data concerning name and affiliations for all of those board-certified specialists were  
152 extracted from the official webpage of the Association  
153 ([https://www.kansensho.or.jp/modules/senmoni/index.php?content\\_id=29](https://www.kansensho.or.jp/modules/senmoni/index.php?content_id=29)) on  
154 November 10, 2021. Also, the Association webpage provided us names of all executive  
155 board members as of 2021. All drugs with additional or new indications for infectious  
156 diseases between 2015 and 2019 were extracted from the database of the  
157 Pharmaceuticals and Medical Devices Agency[13], the Japanese regulatory authority for  
158 drugs and medical devices.

159

160 Payment data from 2016 to 2019 to all healthcare professionals and healthcare  
161 organizations for lecturing, writing, and consulting were collected from all 92  
162 pharmaceutical companies affiliated with Japan Pharmaceutical Manufacturers  
163 Association (JPMA).[14-16] JPMA required that the member companies disclose only

164 the payment for lecturing, writing, and consulting on the individual basis. However,  
165 payment categories such as meals, travel, and accommodations were not disclosed on  
166 each individual specialist. Thus, we could only analyze personal payments concerning  
167 lecturing, writing, and consulting.  
168  
169 Then, we stored all payment data collected from 92 companies into an excel file and  
170 structured the searchable payment database. By searching for the specialist names in the  
171 payment database, the payment data to the infectious disease specialists were extracted  
172 from the payment database. The extracted data included recipient names, recipient  
173 affiliations, monetary amount, number of payment cases, payment category, and name  
174 of pharmaceutical company making the payment. To remove payment data of different  
175 persons with duplicate names in the database, we checked and compared the affiliations,  
176 affiliation address, and recipient specialties among the data from the Association and the  
177 pharmaceutical companies. In cases where affiliation reported by the company differed  
178 from the one reported by the Association, we manually googled the name of specialists  
179 and collected other data from the official institutional webpages and other sources to  
180 verify that they were the same person. The detailed process can be found in our  
181 previously published papers.[5, 14-16]

182

### 183 *Data Analysis*

184 Descriptive analyses were performed for payment values and number of cases on  
 185 individual specialist and pharmaceutical company levels. Average and median payments,  
 186 cases, number of companies making payments per specialist were calculated based on  
 187 the only specialists receiving payment in each year, as in other studies assessing  
 188 pharmaceutical payments to physicians.[17-20] To compare the payments among the  
 189 specialists with and without a leading role in the Association, the average mean and  
 190 median payments were evaluated by the specialists with and without the executive  
 191 board membership. The difference between two groups was assessed by the Mann-  
 192 Whitney U test, as the payments data were not normally distributed.

193 The Gini index and the shares of the payment values held by the top 1%, 5%, 10%, and  
 194 25% of the specialists were calculated to examine distribution and concentration of  
 195 payments. The Gini index ranges from 0 to 1, and the greater the Gini index is, the  
 196 greater the disparity in the distribution of payments on the specialist basis, as performed  
 197 previously.[14, 21, 22] Also payment distributions were geographically examined on  
 198 prefectures and regions, as there were differences in number of the specialists and the  
 199 medical institutions accredited by the Association.

200 The population-averaged generalized estimating equations (GEE) were performed to  
 201 evaluate the payment trends. As the payment distribution was highly skewed  
 202 (Supplemental Material 1), negative binomial GEE model for the payment values per  
 203 specialist, and linear GEE log-linked model with binomial distribution for the  
 204 prevalence of specialists with payments were used. The year of payments was set as  
 205 independent variable, and the payment values per specialist and proportion of  
 206 physicians receiving payments were set as dependent variables. The average annual  
 207 changes in independent variables, payment values per specialist and prevalence of  
 208 specialists with one or more payments, were reported as a relative percentage. As  
 209 several pharmaceutical companies among all 92 companies disaffiliated from the JPMA  
 210 and newly joined the JPMA, there were 18 companies without payment data over the  
 211 four years. Thus, the average and median payments for each year and the trend of  
 212 payments were calculated based on payments from all 92 companies and 74 companies  
 213 with payment data for the four years between 2016 and 2019, as previously described.[3,  
 214 4, 23]

215 Finally, we assessed association between number of drugs with new or additional  
 216 indications and (1) total payments and (2) number of specialists with payments on  
 217 company level using the Spearman's correlation.

218 Japanese yen (¥) was converted into US dollars (\$) using 2019 average monthly  
219 exchange rates of ¥109.0 per \$1. All analyses were conducted using Microsoft Excel,  
220 version 16.0 (Microsoft Corp.) and Stata version 15 (StataCorp.).

221

## 222 **Ethical approval**

223 The Ethics Committee of the Medical Governance Research Institute approved this  
224 study (approval number: MG2018-04-20200605; approval date: June 5, 2020). As this  
225 study was a retrospective analysis of the publicly available information, informed  
226 consent was waived by the Ethics Committee.

227

## 228 **Results**

229 We identified 1,614 infectious disease specialists certified by the Association as of  
230 November 10, 2021. The Association stated that there were a total of 1,622 infectious  
231 disease specialists in Japan, and therefore, names of eight specialists missing were not  
232 disclosed on the webpage, as the specialists could have wished not to disclose their  
233 names on the webpage.

234

## 235 ***Overview and Per-Specialist Payments***

236 Of 1,614 eligible board-certified infectious disease specialists, 1,055 (65.4%) received  
 237 one or more payments, totaling \$17,784,070 corresponding to 21,680 payment counts  
 238 between 2016 and 2019. Among 92 companies, 78 (84.8%) made at least one payment  
 239 to the specialists over the four-year period. The average (standard deviation: SD) and  
 240 median (interquartile range: IQR) were \$16,857 (\$45,010) and \$3,183 (\$938–\$11,250)  
 241 in payments; 20.5 (41.6) and 6.0 (2.0–19.0) in payment cases; and 5.6 (5.2) and 4.0  
 242 (2.0–8.0) in number of pharmaceutical companies per specialist. (Table 1)  
 243  
 244 Regarding the payment distribution, although 34.6% of specialists had no payments,  
 245 5.1% and 2.7% received more than \$50,000 and \$100,000, respectively. The Gini index  
 246 for the four-year cumulative payments per specialist was 0.86. Top 1%, 5%, 10% and  
 247 25% of the specialists occupied 26.3% (95% confidence interval (CI): 21.4%–31.2%),  
 248 61.5% (95% CI: 57.0%–65.9%), 77.2% (95% CI: 73.9%–80.4%), and 93.6% (95% CI:  
 249 92.5%–94.7%) of total payments, respectively. (Supplemental Material 2) One  
 250 specialist received a maximum of \$711,965 payments over the four-year from 21  
 251 pharmaceutical companies.

252

253 Of 18 executive members of the Association as of November 2021, 17 (94.4%) had



254 certification of infectious disease specialists. All the 17 members with the specialist  
 255 certification, including the current Association president, received more substantial  
 256 payments averaging \$163,792 (SD: \$173,475; median: \$95,551; IQR:  
 257 \$54,227–\$207,948) than the specialists without executive board membership ( $p < 0.001$   
 258 in Mann-Whitney U test) over the four-year.

259

#### 260 ***Payment trend between 2016 and 2019***

261 The average annual payments per specialist ranged from \$5,775 (SD: \$13,410) in 2017  
 262 to \$6,134 (SD: \$15,283) in 2016, and median payments were from \$1,430 (IQR:  
 263 \$511–\$4,531) in 2017 to \$1,737 (IQR: \$642–\$5,286) in 2018. The payment values per  
 264 specialist remained constant, with an average annual change of -1.2% (95% CI: -4.7%  
 265 –2.3%,  $p = 0.49$ ). The prevalence of specialists with payments decreased by -1.3% (95%  
 266 CI: -2.9 –0.4,  $p = 0.13$ ) in each year from 47.1% (760 out of 1614) in 2016 to 44.9%  
 267 (724 out of 1614) in 2019, but were not statistically significant ( $p = 0.12$ ).

268

269 Among 78 companies making payments, 10 companies were devoid of the four-year  
 270 continuous payment data. Excluding payments from ten companies, the specialists  
 271 received payments averaging from \$5,562 (SD: \$13,383) in 2017 to \$6,105 (SD:

272 \$13,312) in 2018. There were also no statistically significant annual changes in  
273 payments per specialist (average annual change rate: -1.3% [95% CI: -4.7%–2.3%],  
274 p=0.48) and prevalence of specialists with payments (average annual change rate: -1.4%  
275 [95% CI: -3.1%–0.2%], p=0.093) between 2016 and 2019. (Table 2)

276

### 277 *Payment by pharmaceutical companies*

278 The top companies made 63.8% of the total payments, representing \$11,340,870 and  
279 13,247 cases. (Figure 1) In company level analysis, the average and median number of  
280 specialists with payments per company were 74.9 (SD: 98.8) and 27.0 (IQR: 5.0–113.0),  
281 respectively. The average payments and number of cases per specialist were \$2,333  
282 (SD: \$2,578) and 2.8 (SD: 1.9) cases, respectively. In short, each company made an  
283 average of \$2,333 payments, entailing 2.8 cases per specialist, to 74.9 specialists in  
284 average for the reimbursement of lecturing, consulting and writing.

285 MSD made the largest payments of \$2,493,244 to 460 (28.5%) specialists. Pfizer with  
286 the second largest payments distributed a total of \$1,376,045 payments to 267 (16.5%)  
287 infectious specialists. The average payments per specialist were the highest from  
288 FujiFilm Toyama Chemical (\$7,269), followed by MSD (\$5,456), Pfizer (\$5,154),  
289 Boehringer Ingelheim (\$5,002), and AstraZeneca (\$4,990). Payment categories by each

290 company were described in Supplemental Material 3. MSD also had the largest number  
291 of drugs with new and additional indications (8 drugs), followed by Daiichi Sankyo  
292 Company (5 drugs) and GlaxoSmithKline (5 drugs). (Supplemental Material 4) There  
293 were moderately positive correlations between number of new or additional indications  
294 and (1) total payments ( $r(76)=0.46$ ,  $p<0.001$ ) and (2) number of specialists with  
295 payments ( $r(76)=0.43$ ,  $p<0.001$ ).

296

### 297 *Geographical payment distribution*

298 There were geographical differences in distribution of infectious disease specialists.  
299 (Supplemental Material 5A and 5B) Number of infectious disease specialists per million  
300 populations ranged from 0.8 in Iwate Prefecture to 47.9 in Nagasaki Prefecture, while  
301 the average number of specialists per million was 12.7 in nationwide. There were  
302 geographic differences in total and per-specialist payment distribution as well.  
303 (Supplemental Material 5C and 5D) The average payment values per specialist were the  
304 highest in Okayama Prefecture (\$21,750) and lowest in Ibaraki Prefecture (\$1,574).  
305 In the analysis by region, the number of specialists per million populations ranged from  
306 7.8 in the Hokkaido region (northernmost of Japan), and 8.7 in the Tohoku region  
307 (northernmost of main Japanese islands) to 20.6 in the Kyusyu region (southernmost of

308 Japan). Meanwhile, the average payments per specialist were the highest in Tohoku  
309 region (\$15,057), followed by Chugoku (the western part of main Japanese islands,  
310 \$13,980) and Kyusyu regions (\$13,394).

311

## 312 **Discussion**

313 This study demonstrated that a total \$17,717,264 personal payments, equal to 1.8% of  
314 all payments were distributed to the board-certified infectious disease specialists over  
315 the period of four years in Japan. Among all Japanese board-certified infectious disease  
316 specialists, 65.4% (1,055 out of 1,614) of the specialists received an average of \$16,794  
317 and a median of \$3,183 personal payments from 78 pharmaceutical companies between  
318 2016 and 2019. The payments per specialist and proportion of specialists with at least  
319 one payment remained stable between 2016 and 2019.

320

321 First, this study found that there were substantial financial relationships among the  
322 board-certified infectious disease specialists and pharmaceutical companies in Japan.

323 Although the prevalence of specialists with payments were similar to the previous  
324 findings, ranging from 62.0% among hematologists to 70.6% among medical  
325 oncologists[3, 4, 15, 23], payment values per specialist among the infectious disease

326 specialists (\$3,183 in median four-year combined payments and \$1,430–\$1,720 in  
327 median single-year payments) were higher than all of the available evidence among  
328 pediatric oncologists (\$2,961 in average)[23], pulmonologists (\$2,210 in median)[3],  
329 hematologists (\$2,471 in median)[23], and medical oncologists (\$1,103 in one-year  
330 median)[15] in Japan. Overall, compared to the previous studies, Japanese infectious  
331 disease specialists have higher financial relationships with pharmaceutical companies.

332

333 Second, we found that the payment values and prevalence of specialists with payments  
334 did not significantly change between 2016 and 2019. Kusumi et al. found that the  
335 pharmaceutical companies increasingly prioritized the payments to hematologists in  
336 Japan, with a 11.2% annual increase in payments per specialist.[4] Also, similar trends  
337 were observed by Murayama et al. among Japanese pulmonologists, with 7.8% annual  
338 increase in payments.[3] Our finding was different from these studies, indicating that  
339 the financial relationships among infectious disease specialists and pharmaceutical  
340 companies did not decline nor increase, but remained stable for the last four years.

341 Although we found that there were many drugs newly approved or gained additional  
342 indications for infectious diseases, the Japanese government now recommends  
343 physicians to refrain from using new antibiotics to prevent antimicrobial-resistant

344 bacteria. This trend in payments might be due to the demand for fewer use of new  
345 antibiotics.

346

347 Furthermore, we found that vast majority of payments disproportionately concentrated  
348 only on a small portion of the infectious disease specialists in Japan. Surprisingly, a  
349 small portion of the specialists included authoritative specialists such as leaders of the  
350 Association and other medical societies. For example, the specialist with the largest  
351 payments (\$711,965) was in various authoritative positions such as a full professor at a  
352 private medical university and a very influential television commentator for infectious  
353 disease.[11] Also, he was the current executive member of the Association and other  
354 medical societies.

355 The specialist with the second-largest payments (\$421,678) was also in authoritative  
356 positions such as a full professor at a national university and an executive or council  
357 member at several medical societies, including the Association, and the Japanese  
358 Respiratory Society. He also served on public authorities as an author of the clinical  
359 guidelines for COVID-19 issued by the Japanese Ministry of Health, Labor and  
360 Welfare[7] and as a member of government scientific advisory committee.

361 The specialist with the fourth largest payments (\$318,565) was the former president of

362 the Association who served from 2017 to 2020. He was also a current executive member  
363 of the Association and the deputy chairperson of the Japanese government COVID-19  
364 scientific advisory board, but his COI was not publicly disclosed by neither the  
365 Association nor the Japanese government.[10]

366

367 The receipt of substantial personal payments by executive members of medical societies  
368 was widely prevalent in Japan and other countries such as the US. Saito et al. found that  
369 86.9% of Japanese executive members received a median of \$7,486 personal payments  
370 in 2016, and especially members specialized in internal medicine had higher financial  
371 relationships with pharmaceutical companies.[24] Moynihan et al. elucidated that 72%  
372 of the US influential medical society leaders had financial ties with pharmaceutical  
373 companies,[25] and that 93% of the leaders of Infectious Diseases Society of America  
374 received \$31,805 in median total payments for six years, where the payments were the  
375 most prevalent of ten influential medical societies in the US.[25] Although we did not  
376 evaluate financial relationships during the tenure of the board membership, our findings  
377 indicated that the current board members of Japanese Association for Infectious  
378 Diseases had much larger financial relationships with pharmaceutical companies over  
379 the past several years, with 3.2 times higher median annual payments than those among

380 board members of other Japanese medical societies or at least 4.5 times higher median  
381 annual payment values than that of the Infectious Diseases Society of America.  
382  
383 A number of studies have shown that financial relationships with pharmaceutical  
384 companies influence physicians' behavior in prescribing drugs,[26-30] recommending  
385 clinical guidelines,[5, 8, 31-33] and commenting on drugs in pharmaceutical advisory  
386 committees.[34-37] Pharmaceutical companies sometimes spend more payments for  
387 marketing less effective and less advantageous drugs[38, 39] but with more harms to  
388 patients.[40, 41] Despite these influences, the trends of the physicians' acceptance of  
389 personal payments from industries are still common[17, 42, 43] and are even increasing  
390 in several specialties.[3, 4, 23, 44] More transparency is required to reduce the undue  
391 influences of financial relationships with pharmaceutical companies on physician  
392 behaviors and potentially patients care,[28, 45] to increase trust in healthcare, and to  
393 provide patients with more information about their treatment.[46-49] However, there is  
394 no consensus on how to manage the financial relationships, and how to increase  
395 independency of healthcare professionals toward their primary interest of treating  
396 patients based on their best knowledge and conscience.[50] Restriction of these personal  
397 payments to the specialists to a certain degree would be a simple and reasonable



398 solution, but it is equally hard to implement by the professional medical societies when  
399 many of the society board members and societies themselves are financially tied to  
400 pharmaceutical companies. In the case of the Association, financial COIs self-declared  
401 by the board members were not publicly disclosed, and there was no restriction of the  
402 financial relationships among pharmaceutical companies and the board-certified  
403 specialists as of now.

404

405 This analysis has few limitations. As we previously noted, our manual collection of  
406 payment data from 92 pharmaceutical companies' webpages might have included  
407 unavoidable human errors, despite our careful cross-checks to exclude duplicate  
408 physicians from the data. Second, currently, pharmaceutical companies do not disclose  
409 their payments concerning meals, beverages, accommodations, travel and stock  
410 ownerships, according to the JPMA guidance. This could have underestimated the  
411 extent and prevalence of overall financial relationships among the specialists and  
412 industries. Third, the data disclosed by the Association and pharmaceutical companies  
413 did not provide us many of detailed demographics of the specialists such as the  
414 specialists' gender, affiliation characteristics, positions within their affiliations, and their  
415 academic and clinical performances. Therefore, there would have been influence of

416 many unavoidable confounders on the personal payments at individual specialist level.  
417 However, our robust statistical analysis with GEE modeling has helped nullify effects of  
418 such confounders to some extent. Still, further studies should have elucidated the  
419 relations among the specialists' characteristics and the personal payments. Finally, this  
420 study was based on the open-access payment data and Japanese board-certified  
421 infectious disease specialists. Thus, the payment magnitude and trend may not be  
422 exactly replicable to other countries' specialists. However, this might serve as a pathway  
423 for prospective researchers to explore the same in other countries as well.

424

## 425 **Conclusion**

426 The majority of the certified infectious disease specialists received substantial personal  
427 payments for the reimbursements of lecturing, consulting and writing from the  
428 pharmaceutical companies in Japan. These financial relationships with those companies  
429 remained stable for the past four years in Japan. Furthermore, high ranked specialists  
430 such as those in the executive board had stronger financial ties with the companies.  
431 Such personal payments must be restricted to a certain level to avoid potential conflict  
432 of interest.

433

## 434 **Acknowledgment**

435 The authors thank the Tansa (formerly known as Waseda Chronicle) for providing  
436 payment data. Also, we appreciate Mr. Souto Nagano, an undergraduate student from  
437 the Faculty of Letters, University of Tokyo; Mr. Kohki Yamada, a medical student at the  
438 Osaka University School of Medicine; Mr. Takuto Sakaemura, an undergraduate student  
439 from Faculty of Applied Science, Simon Fraser University; and Ms. Megumi Aizawa, a  
440 graduate student from the Department of Industrial Engineering and Economics, School  
441 of Engineering, Tokyo Institute of Technology, for their dedicated contributions on  
442 collecting and cross-checking the payment data.

443

## 444 **References**

- 445 1. Agrawal S, Brennan N, Budetti P. The Sunshine Act--effects on physicians. *N Engl J Med* **2013**;  
446 368(22): 2054-7.
- 447 2. Pham-Kanter G. Act II of the Sunshine Act. *PLoS Med* **2014**; 11(11): e1001754.
- 448 3. Murayama A, Hoshi M, Saito H, et al. Nature and Trends of Pharmaceutical Payments to Board  
449 Certificated Respiratory Specialists in Japan between 2016 and 2019. *medRxiv* **2022**:  
450 2022.01.16.22269188.
- 451 4. Kusumi E, Murayama A, Kamamoto S, et al. Pharmaceutical Payments to Japanese Certificated  
452 Hematologists: A Retrospective Analysis of Personal Payments from Pharmaceutical Companies  
453 between 2016 and 2019. *medRxiv* **2022**: 2022.01.17.22269284.
- 454 5. Murayama A, Kida F, Ozaki A, Saito H, Sawano T, Tanimoto T. Financial and Intellectual  
455 Conflicts of Interest Among Japanese Clinical Practice Guidelines Authors for Allergic Rhinitis.  
456 *Otolaryngol Head Neck Surg* **2021**; 0(0): 1945998211034724.
- 457 6. Kida F, Murayama A, Saito H, Ozaki A, Shimada Y, Tanimoto T. Pharmaceutical company  
458 payments to authors of the Japanese Clinical Practice Guidelines for Hepatitis C treatment. *Liver*  
459 *International* **2021**; 41(3): 464-9.

- 460 7. Hashimoto T, Murayama A, Mamada H, Saito H, Tanimoto T, Ozaki A. Evaluation of Financial  
461 Conflicts of Interest and Drug Statements in the Coronavirus Disease 2019 Clinical Practice  
462 Guideline in Japan. *Clin Microbiol Infect* **2021**.
- 463 8. Johnson L, Stricker RB. Attorney General forces Infectious Diseases Society of America to redo  
464 Lyme guidelines due to flawed development process. *J Med Ethics* **2009**; 35(5): 283-8.
- 465 9. Saito H, Tani Y, Ozaki A, et al. Financial ties between authors of the clinical practice guidelines  
466 and pharmaceutical companies: an example from Japan. *Clin Microbiol Infect* **2019**; 25(11):  
467 1304-6.
- 468 10. Mamada H, Murayama A, Ozaki A, et al. Financial and Non-financial Conflicts of Interest  
469 Among the Japanese Government Advisory Board Members Concerning Coronavirus Disease  
470 2019. *medRxiv* **2021**.
- 471 11. Murayama A, Ozaki A, Saito H, Sawano T, Sah R, Tanimoto T. Coronavirus disease 2019  
472 experts appearing on Japanese television: their characteristics and financial conflicts of interest  
473 with pharmaceutical companies. *Clinical Microbiology and Infection* **2020**.
- 474 12. Koike S, Matsumoto M, Ide H, Kawaguchi H, Shimpo M, Yasunaga H. Internal medicine board  
475 certification and career pathways in Japan. *BMC Medical Education* **2017**; 17(1): 83.
- 476 13. Pharmaceuticals and Medical Devices Agency. List of approved products. Available at:  
477 <https://www.pmda.go.jp/english/review-services/reviews/approved-information/drugs/0002.html>.  
478 Accessed February 24.
- 479 14. Murayama A, Ozaki A, Saito H, et al. Pharmaceutical company payments to dermatology  
480 Clinical Practice Guideline authors in Japan. *PLoS One* **2020**; 15(10): e0239610.
- 481 15. Ozaki A, Saito H, Onoue Y, et al. Pharmaceutical payments to certified oncology specialists in  
482 Japan in 2016: a retrospective observational cross-sectional analysis. *BMJ Open* **2019**; 9(9):  
483 e028805.
- 484 16. Saito H, Ozaki A, Sawano T, Shimada Y, Tanimoto T. Evaluation of Pharmaceutical Company  
485 Payments and Conflict of Interest Disclosures Among Oncology Clinical Practice Guideline  
486 Authors in Japan. *JAMA Netw Open* **2019**; 2(4): e192834.
- 487 17. Tarras ES, Marshall DC, Rosenzweig K, Korenstein D, Chimonas S. Trends in Industry  
488 Payments to Medical Oncologists in the United States Since the Inception of the Open Payments  
489 Program, 2014 to 2019. *JAMA Oncology* **2021**; 7(3): 440-4.
- 490 18. Tringale KR, Marshall D, Mackey TK, Connor M, Murphy JD, Hattangadi-Gluth JA. Types and  
491 Distribution of Payments From Industry to Physicians in 2015. *JAMA* **2017**; 317(17): 1774-84.
- 492 19. Tringale KR, Hattangadi-Gluth JA. Types and Distributions of Biomedical Industry Payments to  
493 Men and Women Physicians by Specialty, 2015. *JAMA Intern Med* **2018**; 178(3): 421-3.
- 494 20. Feng H, Wu P, Leger M. Exploring the Industry-Dermatologist Financial Relationship: Insight  
495 From the Open Payment Data. *JAMA Dermatol* **2016**; 152(12): 1307-13.

- 496 21. Yamamoto K, Murayama A, Ozaki A, Saito H, Sawano T, Tanimoto T. Financial conflicts of  
497 interest between pharmaceutical companies and the authors of urology clinical practice  
498 guidelines in Japan. *Int Urogynecol J* **2021**; 32(2): 443-51.
- 499 22. Ozieranski P, Csanadi M, Rickard E, Tchilingirian J, Mulinari S. Analysis of Pharmaceutical  
500 Industry Payments to UK Health Care Organizations in 2015. *JAMA Netw Open* **2019**; 2(6):  
501 e196253.
- 502 23. Kusumi E, Murayama A, Kamamoto S, et al. Pharmaceutical Payments to Japanese Certificated  
503 Pediatric Hematologist/Oncologists: a cross-sectional analysis of personal payments from  
504 pharmaceutical companies between 2016 and 2019. *Authorea Preprints* **2022**.
- 505 24. Saito H, Ozaki A, Kobayashi Y, Sawano T, Tanimoto T. Pharmaceutical Company Payments to  
506 Executive Board Members of Professional Medical Associations in Japan. *JAMA Intern Med*  
507 **2019**; 179(4): 578-80.
- 508 25. Moynihan R, Albarqouni L, Nangla C, Dunn AG, Lexchin J, Bero L. Financial ties between  
509 leaders of influential US professional medical associations and industry: cross sectional study.  
510 *BMJ* **2020**; 369: m1505.
- 511 26. Perlis RH, Perlis CS. Physician Payments from Industry Are Associated with Greater Medicare  
512 Part D Prescribing Costs. *PLOS ONE* **2016**; 11(5): e0155474.
- 513 27. DeJong C, Aguilar T, Tseng C-W, Lin GA, Boscardin WJ, Dudley RA. Pharmaceutical Industry–  
514 Sponsored Meals and Physician Prescribing Patterns for Medicare Beneficiaries. *JAMA Internal*  
515 *Medicine* **2016**; 176(8): 1114-22.
- 516 28. Mitchell AP, Trivedi NU, Gennarelli RL, et al. Are Financial Payments From the Pharmaceutical  
517 Industry Associated With Physician Prescribing? : A Systematic Review. *Ann Intern Med* **2020**.
- 518 29. Goupil B, Balusson F, Naudet F, et al. Association between gifts from pharmaceutical companies  
519 to French general practitioners and their drug prescribing patterns in 2016: retrospective study  
520 using the French Transparency in Healthcare and National Health Data System databases. *BMJ*  
521 **2019**; 367: l6015.
- 522 30. Inoue K, Figueroa JF, DeJong C, et al. Association Between Industry Marketing Payments and  
523 Prescriptions for PCSK9 (Proprotein Convertase Subtilisin/Kexin Type 9) Inhibitors in the  
524 United States. *Circulation: Cardiovascular Quality and Outcomes* **2021**; 14(5): e007521.
- 525 31. Nejstgaard CH, Bero L, Hrobjartsson A, et al. Association between conflicts of interest and  
526 favourable recommendations in clinical guidelines, advisory committee reports, opinion pieces,  
527 and narrative reviews: systematic review. *BMJ* **2020**; 371: m4234.
- 528 32. Coyne DW. Influence of Industry on Renal Guideline Development. *Clinical Journal of the*  
529 *American Society of Nephrology* **2007**; 2(1): 3-7.
- 530 33. Steinbrook R. Guidance for guidelines. *N Engl J Med* **2007**; 356(4): 331-3.
- 531 34. Arthur W, Austin J, Wayant C, Vassar M. Association of Conflicts of Interest for Public Speakers

- 532 for the Peripheral and Central Nervous System Drugs Advisory Committee of the US Food and
- 533 Drug Administration With Their Statements. *JAMA Neurology* **2019**; 76(3): 368-9.
- 534 35. Bickford T, Kinder N, Arthur W, Wayant C, Vassar M. The Potential Effects of Financial
- 535 Conflicts of Interest of Speakers at the US Food and Drug Administration's Pulmonary-Allergy
- 536 Drug Advisory Committee Meetings. *Chest* **2021**; 159(6): 2399-401.
- 537 36. Johnson BS, Roberts W, Riddle J, Wayant C, Scott J, Vassar M. Potential Financial Bias From
- 538 Speakers at US Food and Drug Administration's Bone, Reproductive, and Urologic Drugs
- 539 Advisory Committee Meetings. *Urology* **2020**; 137: 1-6.
- 540 37. Cooper CM, Jellison S, Vassar M. Characteristics of Open Public Hearing Speakers of the
- 541 Tobacco Products Scientific Advisory Committee meetings. *Tob Prev Cessat* **2018**; 4: 35-.
- 542 38. Greenway T, Ross JS. US drug marketing: how does promotion correspond with health value?
- 543 *Bmj* **2017**; 357: j1855.
- 544 39. Lexchin J. The relation between promotional spending on drugs and their therapeutic gain: a
- 545 cohort analysis. *CMAJ Open* **2017**; 5(3): E724-e8.
- 546 40. Eichacker PQ, Natanson C, Danner RL. Surviving Sepsis — Practice Guidelines, Marketing
- 547 Campaigns, and Eli Lilly. *New England Journal of Medicine* **2006**; 355(16): 1640-2.
- 548 41. Mitchell AP, Winn AN, Dusetzina SB. Pharmaceutical Industry Payments and Oncologists'
- 549 Selection of Targeted Cancer Therapies in Medicare Beneficiaries. *JAMA Intern Med* **2018**;
- 550 178(6): 854-6.
- 551 42. Marshall DC, Tarras ES, Rosenzweig K, Korenstein D, Chimonas S. Trends in Industry
- 552 Payments to Physicians in the United States From 2014 to 2018. *JAMA* **2020**; 324(17): 1785-8.
- 553 43. Ahlawat A, Narayanaswami P. Financial relationships between neurologists and industry.
- 554 *Neurology* **2019**; 92(21): 1006.
- 555 44. Putman MS, Goldsher JE, Crowson CS, Duarte-García A. Industry Payments to Practicing US
- 556 Rheumatologists, 2014–2019. *Arthritis & Rheumatology* **2021**; 73(11): 2138-44.
- 557 45. Ozaki A, Murayama A, Saito H, et al. Transparency Is Not Enough: How Can We Improve the
- 558 Management of Financial Conflicts of Interest Between Pharma and Healthcare Sectors? *Clin*
- 559 *Pharmacol Ther* **2020**.
- 560 46. Kanter GP, Carpenter D, Lehmann LS, Mello MM. US Nationwide Disclosure of Industry
- 561 Payments and Public Trust in Physicians. *JAMA Network Open* **2019**; 2(4): e191947-e.
- 562 47. Lopez J, Naved BA, Pradeep T, et al. What Do Plastic Surgery Patients Think of Financial
- 563 Conflicts of Interest and the Sunshine Act? *Annals of Plastic Surgery* **2019**; 82(6): 597-603.
- 564 48. Kanter GP, Carpenter D, Lehmann L, Mello MM. Effect of the public disclosure of industry
- 565 payments information on patients: results from a population-based natural experiment. *BMJ*
- 566 *Open* **2019**; 9(2): e024020.
- 567 49. Stein GE, Kamler JJ, Chang JS. Ophthalmology Patient Perceptions of Open Payments

568 Information. JAMA Ophthalmology **2018**; 136(12): 1375-81.  
569 50. Moynihan R, Bero L, Hill S, et al. Pathways to independence: towards producing and using  
570 trustworthy evidence. BMJ **2019**; 367: 16576.  
571  
572  
573

**Table 1. Summary of personal payments from Japanese pharmaceutical companies to infectious disease specialists certified by the Japanese Association for Infectious Disease between 2016 and 2019**

| Variables                                |                    |
|------------------------------------------|--------------------|
| Total                                    |                    |
| Payment values, US\$                     | 17,784,070         |
| Cases, n                                 | 21,680             |
| Companies, n                             | 78                 |
| Average per specialist (SD)              |                    |
| Payment values, US\$                     | 16,857 (45,010)    |
| Cases, n                                 | 20.5 (41.6)        |
| Companies, n                             | 5.6 (5.2)          |
| Median per specialist (IQR)              |                    |
| Payment values, US\$                     | 3,183 (938–11,250) |
| Cases, n                                 | 6.0 (2.0–19.0)     |
| Companies, n                             | 4.0 (2.0–8.0)      |
| Range                                    |                    |
| Payment values, US\$                     | 31–711,965         |
| Cases, n                                 | 1.0–538.0          |
| Companies, n                             | 1.0–29.0           |
| Physicians with specific payments, n (%) |                    |
| Any payments                             | 1,055 (65.4)       |
| Payments >US\$500                        | 930 (57.6)         |
| Payments >US\$1,000                      | 776 (48.1%)        |
| Payments >US\$5,000                      | 419 (26.0)         |
| Payments >US\$10,000                     | 290 (18.0)         |
| Payments >US\$50,000                     | 82 (5.1)           |
| Payments >US\$100,000                    | 43 (2.7)           |
| Gini index                               | 0.857              |
| Category of payments                     |                    |
| Lecturing                                |                    |
| Payment value, US\$ (%)                  | 14,607,478 (82.1)  |
| Cases, n (%)                             | 18,078 (83.1)      |
| Consulting                               |                    |
| Payment value, US\$ (%)                  | 1,981,003 (11.1)   |
| Cases, n (%)                             | 2,122 (9.8)        |
| Writing                                  |                    |
| Payment value, US\$ (%)                  | 797,929 (4.5)      |
| Cases, n (%)                             | 1,086 (5.0)        |
| Other                                    |                    |
| Payment value, US\$ (%)                  | 397,659 (2.2)      |
| Cases, n (%)                             | 459 (2.1)          |



**Table 2. Trends of personal payments from Japanese pharmaceutical companies to infectious disease specialists certified by the Japanese Association for Infectious Disease between 2016 and 2019**

| Variables                                                               | 2016               | 2017               | 2018               | 2019               | Average yearly change (95%CI), % | p-value | Combined total     |
|-------------------------------------------------------------------------|--------------------|--------------------|--------------------|--------------------|----------------------------------|---------|--------------------|
| <b>All pharmaceutical companies</b>                                     |                    |                    |                    |                    |                                  |         |                    |
| Total payments , US\$                                                   | 4,662,217          | 4,215,566          | 4,538,520          | 4,367,767          | □                                | □       | 17,78,4070         |
| Average payments (SD), US\$                                             | 6,134 (15,283)     | 5,775 (13,410)     | 6,108 (13,324)     | 6,033 (11,837)     | -1.2 (-4.7□2.3)                  | 0.49    | 16,857 (45,010)    |
| Median payments (IQR), US\$                                             | 1,604 (511-□4,646) | 1,430 (511-□4,531) | 1,737 (642-□5,286) | 1,554 (662-□5,258) |                                  |         | 3,183 (938□11,250) |
| Payment range, US\$                                                     | 92□216,035         | 92□160,610         | 95□190,726         | 31□144,593         | □                                | □       | 31□711,965         |
| <b>Physicians with specific payments, n (%)</b>                         |                    |                    |                    |                    |                                  |         |                    |
| Any payments                                                            | 760 (47.1%)        | 730 (45.2%)        | 743 (46.0%)        | 724 (44.9%)        | -1.3 (-2.9□0.4)                  | 0.13    | 1,055 (65.4%)      |
| Payments >US\$500                                                       | 612 (37.9%)        | 594 (36.8%)        | 628 (38.9%)        | 616 (38.2%)        | 0.8 (-1.1□2.6)                   | 0.43    | 930 (57.6%)        |
| Payments >US\$1,000                                                     | 482 (29.9%)        | 436 (27.0%)        | 485 (30.0%)        | 453 (28.1%)        | -0.8 (-2.9%□1.3)                 | 0.45    | 776 (48.1%)        |
| Payments >US\$5,000                                                     | 175 (10.8%)        | 178 (11.0%)        | 193(12.0%)         | 187 (11.6%)        | 2.8 (-0.8□6.5)                   | 0.13    | 419 (26.0%)        |
| Payments >US\$10,000                                                    | 106 (6.6%)         | 94 (5.8%)          | 113 (7.0%)         | 103 (6.4%)         | 1.0 (-3.6□5.7)                   | 0.68    | 290 (18.0%)        |
| Payments >US\$50,000                                                    | 16 (1.0%)          | 14 (0.9%)          | 17 (1.1%)          | 14 (0.9%)          | -1.9 (-15.9□14.3)                | 0.80    | 82 (5.1%)          |
| Payments >US\$100,000                                                   | 4 (0.2%)           | 3 (0.2%)           | 1 (0.1%)           | 2 (0.1%)           | -28.3 (-52.4□8.1)                | 0.11    | 43 (2.7%)          |
| Gini index                                                              | 0.878              | 0.881              | 0.870              | 0.876              | □                                | □       | 0.860              |
| <b>Pharmaceutical companies with four-year payment data<sup>a</sup></b> |                    |                    |                    |                    |                                  |         |                    |
| Total payments , US\$                                                   | 4,597,653          | 4,205,920          | 4,492,988          | 4,314,421          | □                                | □       | 17,610,982         |
| Average payments (SD), US\$                                             | 6,074 (15,169)     | 5,562 (13,383)     | 6,105 (13,312)     | 5,992 (12,825)     | -1.3 (-4.7□2.3)                  | 0.48    | 16,788 (44,820)    |
| Median payments (IQR), US\$                                             | 1,603 (511-□4,642) | 1,430 (511-□4,525) | 1,737 (613-□5,280) | 1,552 (662-□5,258) |                                  |         | 3,183 (920□11,238) |
| Payment range, US\$                                                     | 92□215,089         | 92□160,610         | 92□190,726         | 31□143,571         | □                                | □       | 31□709,997         |
| <b>Physicians with specific payments, n (%)</b>                         |                    |                    |                    |                    |                                  |         |                    |
| Any payments                                                            | 757 (46.9)         | 730 (45.3)         | 736 (45.6)         | 720 (44.6)         | -1.4 (-3.1□0.2)                  | 0.093   | 1,049 (65.0)       |
| Payments >US\$500                                                       | 609 (37.7)         | 593 (36.7)         | 620 (38.4)         | 610 (37.8)         | 0.5 (-1.4□2.4)                   | 0.60    | 927 (57.4)         |
| Payments >US\$1,000                                                     | 478 (29.6)         | 436 (27.0)         | 481 (29.8)         | 452 (28.0)         | -0.7 (-2.8□1.4)                  | 0.51    | 768 (47.6)         |
| Payments >US\$5,000                                                     | 172 (10.7)         | 179 (11.1)         | 191 (11.8)         | 186 (11.5)         | 3.1 (-0.6□6.8)                   | 0.10    | 415 (25.7)         |
| Payments >US\$10,000                                                    | 106 (6.6)          | 94 (5.8)           | 112 (7.1)          | 103 (6.4)          | 0.9 (-3.7□5.6)                   | 0.71    | 289 (17.9)         |
| Payments >US\$50,000                                                    | 14 (0.9)           | 14 (0.9)           | 17 (1.1)           | 14 (0.9)           | 0.0 (-13.7□15.9)                 | 1.0     | 82 (5.1)           |

|                       |                      |               |            |                 |                   |      |          |
|-----------------------|----------------------|---------------|------------|-----------------|-------------------|------|----------|
| Payments >US\$100,000 | 4 (0.2)              | 3 (0.2)       | 1 (0.1)    | 2 (0.1)         | -28.3 (-52.4□8.1) | 0.11 | 42 (2.6) |
| Gini index            | 0.879                | 0.881         | 0.871      | 0.876           | □                 | □    | 0.860    |
| <b>IQR:</b>           | <b>interquartile</b> | <b>range;</b> | <b>SD:</b> | <b>standard</b> | <b>deviation</b>  |      |          |

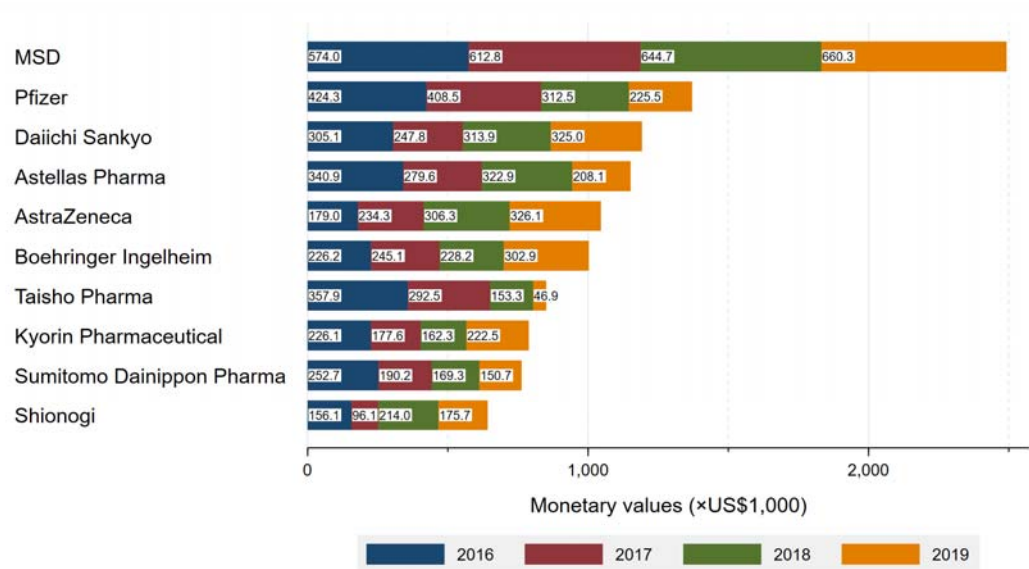

Figure 1. Total payment by company

The figure consists of four subplots arranged in a 2x2 grid, each representing a different payment year: 2016, 2017, 2018, and 2019. The y-axis for all plots is 'Number of infectious disease specialists' ranging from 0 to 350. The x-axis is 'Monetary values (×US\$1,000)' ranging from 0 to 200. Each plot shows a histogram of monetary values. The distributions are highly right-skewed, with a very high frequency of specialists receiving low monetary values (below 50,000 US dollars) and a long tail extending towards higher values. The peak frequency for each year is approximately 300-350 specialists at the lowest monetary value bin.

Supplemental Material 2. Payment concentration

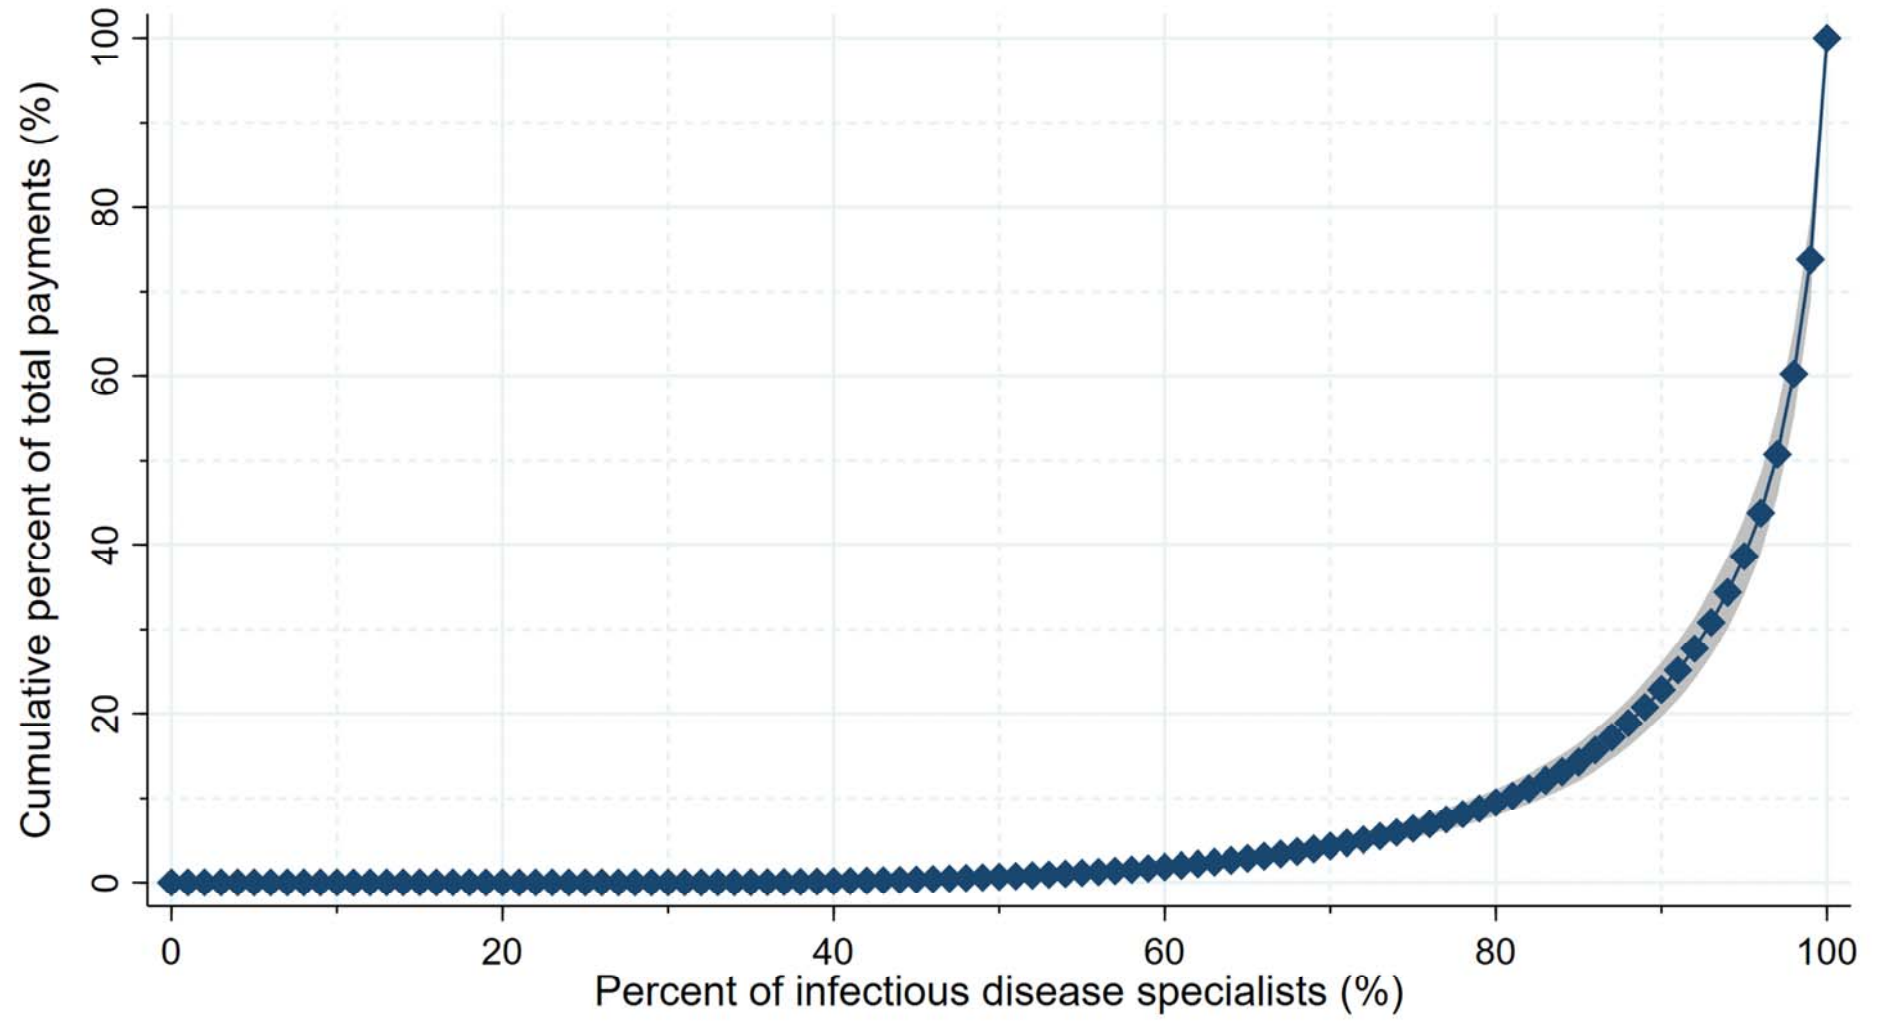



### Supplemental Material 3. Payment category by company

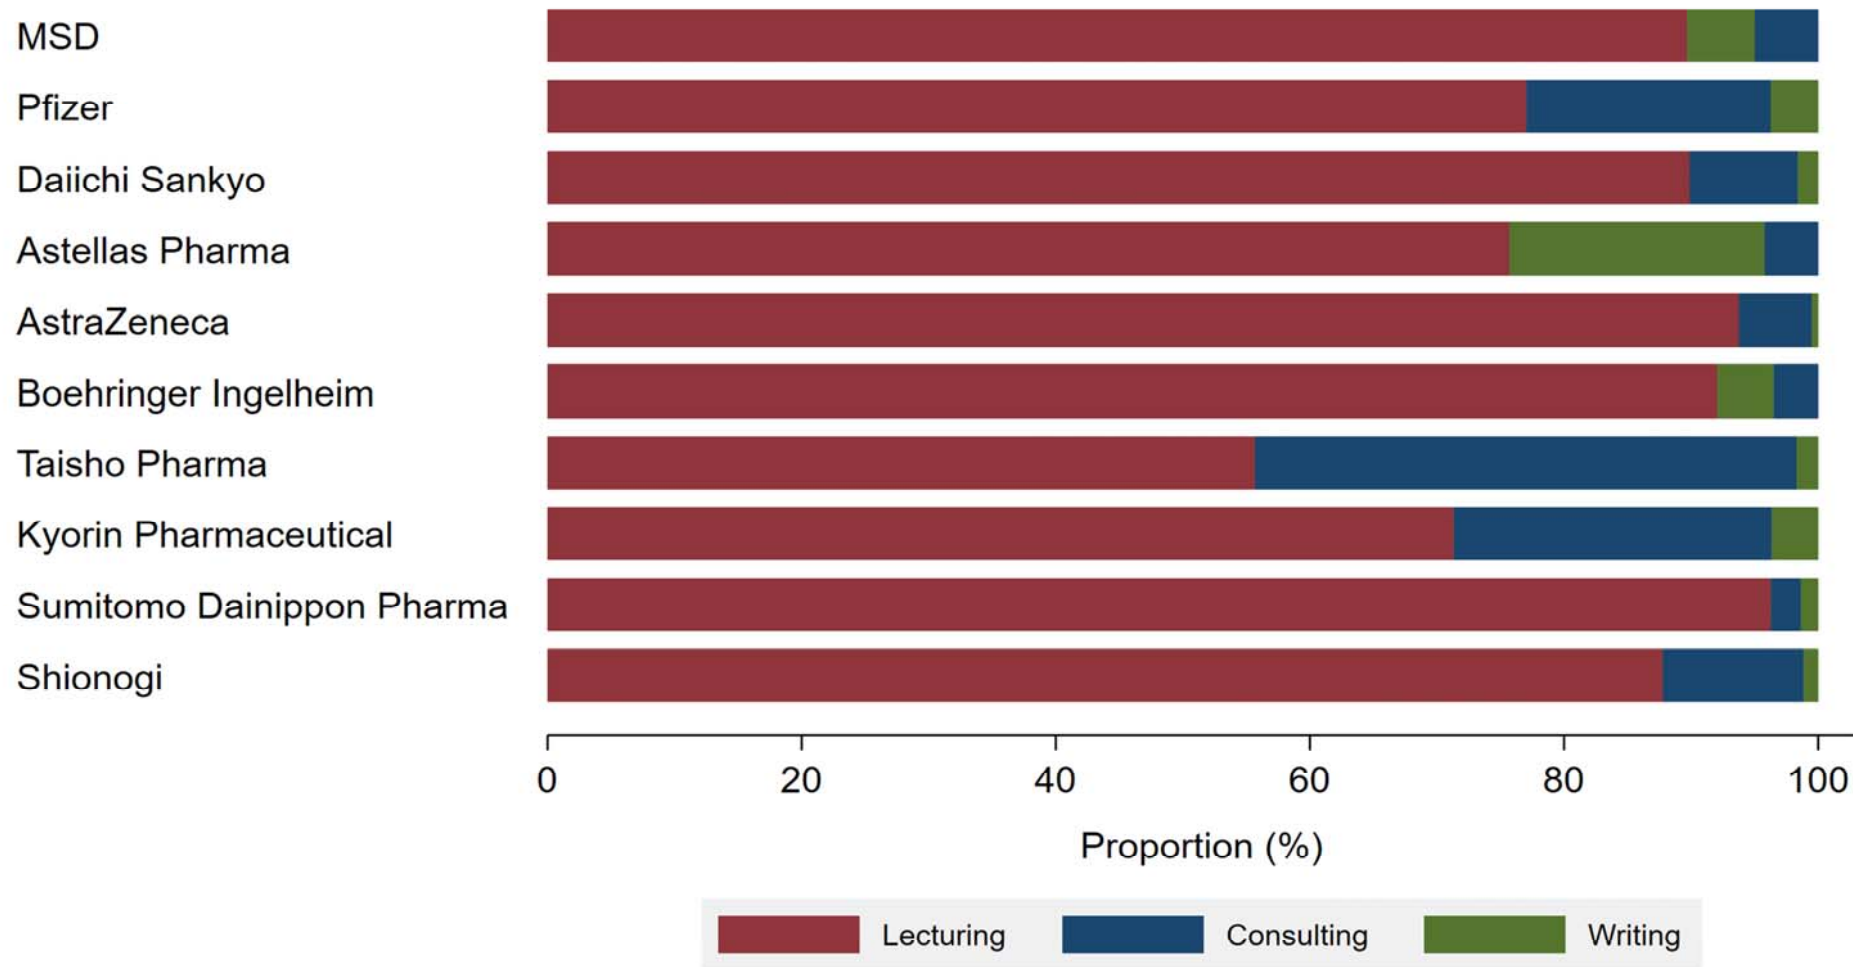



Supplemental Material 4. New and additional indications for infectious diseases in Japan between 2015 and 2019

| Brand name      | Name                                                                          | Pharmaceutical companies                                                                                            | Approval date      | Price per drug unit, US\$*                                | Indication                                                                                                                                                                                              | Category              |
|-----------------|-------------------------------------------------------------------------------|---------------------------------------------------------------------------------------------------------------------|--------------------|-----------------------------------------------------------|---------------------------------------------------------------------------------------------------------------------------------------------------------------------------------------------------------|-----------------------|
| <b>ZERBAXA</b>  | Ceftolozane sulfate/Tazobactam sodium                                         | Manufacturer and distributor: MSD K. K                                                                              | December 20, 2019  | \$59 (1.5g/bottle)                                        | Treatment of sepsis and pneumonia caused by Serratia and Hemophilus influenza                                                                                                                           | Additional indication |
| <b>LASVIC</b>   | Lascufloxacin hydrochloride                                                   | Manufacturer and distributor: Kyorin Pharmaceuticals                                                                | September 20, 2019 | \$3 (75mg/pill)<br>\$37 (150mg/ intravenous infusion kit) | Treatment of laryngopharyngitis, tonsillitis, acute bronchitis, pneumonia, secondary infection of chronic respiratory disease, otitis media and sinusitis                                               | New approval          |
| <b>MAVIRET</b>  | Glecaprevir hydrate/Pibrentasvir                                              | Manufacturer and distributor: AbbVie GK                                                                             | August 22, 2019    | \$168/pill                                                | Improvement of viremia in patients with chronic hepatitis C or compensated cirrhosis type C                                                                                                             | Additional indication |
| <b>AZIMYCIN</b> | Azithromycin hydrate                                                          | Manufacturer and distributor: Senju Pharmaceuticals<br>Distributor: Takeda Pharmaceutical                           | June 18, 2019      | \$3 (1% 1ml eye-drops)                                    | Treatment of conjunctivitis, blepharitis, hordeolum and dacryocystitis                                                                                                                                  | New approval          |
| <b>SYMTUZA</b>  | Darunavir ethanolate/Cobicistat /Emtricitabine/Tenofovir alafenamide fumarate | Manufacturer and distributor: Janssen Pharmaceutical K. K                                                           | June 18, 2019      | \$44/pill                                                 | Treatment of HIV-1 infection                                                                                                                                                                            | New approval          |
| <b>INAVIR</b>   | Laninamivir octanoate hydrate                                                 | Manufacturer and distributor: Daiichi Sankyo                                                                        | June 18, 2019      | \$20 (20mg/inhalation kit)<br>\$39 (160mg/bottle)         | Treatment of influenza A or B virus infection                                                                                                                                                           | New approval          |
| <b>GENVOYA</b>  | Elvitegravir/Cobicistat /Emtricitabine/Tenofovir alafenamide fumarate         | Manufacturer and distributor: Gilead Sciences                                                                       | May 22, 2019       | \$65/pill                                                 | Treatment of HIV-1 infection                                                                                                                                                                            | Additional indication |
| <b>BIKTARVY</b> | Bictegravir sodium/ Emtricitabine/Tenofovir alafenamide fumarate              | Manufacturer and distributor: Gilead Sciences                                                                       | March 26, 2019     | \$65/pill                                                 | Treatment of HIV-1 infection                                                                                                                                                                            | New approval          |
| <b>ZERBAXA</b>  | Ceftolozane sulfate/Tazobactam sodium                                         | Manufacturer and distributor: MSD K. K                                                                              | January 8, 2019    | \$59 (1.5g/bottle)                                        | Treatment of cystitis, pyelonephritis, peritonitis, intra-abdominal abscess, cholecystitis and liver abscess                                                                                            | New approval          |
| <b>EPCLUSA</b>  | Sofosbuvir/Velpatasvir                                                        | Manufacturer and distributor: Gilead Sciences                                                                       | January 8, 2019    | \$562/pill                                                | Improvement of viremia in patients with chronic hepatitis C or compensated cirrhosis type C who have previously been treated.<br>Improvement of viremia in patients with decompensated cirrhosis type C | New approval          |
| <b>REBETROL</b> | Ribavirin                                                                     | Manufacturer and distributor: ViiV Healthcare<br>Distributor: GlaxoSmithKline K. K<br>Promotional partner: Shionogi | January 8, 2019    | \$4 (200mg)                                               | Improvement of viremia in patients with chronic hepatitis C or compensated cirrhosis type C who have previously been treated                                                                            | Additional indication |
| <b>JULUCA</b>   | Dolutegravir sodium/Rilpivirine hydrochloride                                 | Manufacturer and distributor: ViiV Healthcare                                                                       | November 26, 2018  | \$50/pill                                                 | Treatment of HIV-1 infection                                                                                                                                                                            | New approval          |

|                   |                                                                           |                                                                                                |                    |                                                                                           |                                                                                                                                                              |                       |
|-------------------|---------------------------------------------------------------------------|------------------------------------------------------------------------------------------------|--------------------|-------------------------------------------------------------------------------------------|--------------------------------------------------------------------------------------------------------------------------------------------------------------|-----------------------|
| <b>ODEFSEY</b>    | Rilpivirine hydrochloride /Emtricitabine/Tenofovir alafenamide fumarate   | Distributor: GlaxoSmithKline K. K<br>Manufacturer and distributor: Janssen Pharmaceutical K. K | August 21, 2018    | \$56/pill                                                                                 | Treatment of HIV-1 infection                                                                                                                                 | New approval          |
| <b>ISENTRESS</b>  | Raltegravir potassium                                                     | Manufacturer and distributor: MSD K. K                                                         | May 14, 2018       | \$15 (400mg/pill)<br>\$15 (600mg/pill)                                                    | Treatment of HIV infection                                                                                                                                   | New approval          |
| <b>KAKETSUKEN</b> | Emulsion-adjuvanted cell-culture derived influenza HA vaccine (H5N1)      | Manufacturer and distributor: The Chemo-Sero-Therapeutic Research Institute                    | March 23, 2018     | NA                                                                                        | Prevention of pandemic influenza (H5N1)                                                                                                                      | Additional indication |
| <b>KAKETSUKEN</b> | Emulsion-adjuvanted cell-culture derived influenza HA vaccine (prototype) | Manufacturer and distributor: The Chemo-Sero-Therapeutic Research Institute                    | March 23, 2018     | NA                                                                                        | Prevention of pandemic influenza                                                                                                                             | Additional indication |
| <b>XOFLUZA</b>    | Baloxavir marboxil                                                        | Manufacturer and distributor: Shionogi                                                         | February 23, 2018  | \$14 (10mg/pill)<br>\$22 (20mg/pill)                                                      | Treatment of influenza A or B virus infections                                                                                                               | New approval          |
| <b>HARVONI</b>    | Ledipasvir acetate/Sofosbuvir                                             | Manufacturer and distributor: Gilead Sciences                                                  | February 16, 2018  | \$509/pill                                                                                | Improvement of viremia in patients with chronic hepatitis C or compensated cirrhosis type C in serogroup 2                                                   | Additional indication |
| <b>ZINPLAVA</b>   | Bezlotoxumab                                                              | Manufacturer and distributor: MSD K. K                                                         | September 27, 2017 | \$3081 (625mg/25ml bottle)                                                                | Prevention of recurrent Clostridium difficile infection                                                                                                      | New approval          |
| <b>MAVIRET</b>    | Glecaprevir hydrate/ Pibrentasvir                                         | Manufacturer and distributor: AbbVie GK                                                        | September 27, 2017 | \$168/pill                                                                                | Improvement of viremia in patients with chronic hepatitis C or compensated cirrhosis type C                                                                  | New approval          |
| <b>TAMIFLU</b>    | Oseltamivir phosphate                                                     | Manufacturer and distributor: Chugai Pharmaceutical                                            | March 24, 2017     | \$2 (75mg/pill)<br>\$2 (3%/g dry syrup)                                                   | Treatment of influenza A or B virus infection                                                                                                                | Additional indication |
| <b>SOVALDI</b>    | Sofosbuvir                                                                | Manufacturer and distributor: Gilead Sciences                                                  | March 24, 2017     | \$395 (400mg/pill)                                                                        | Improvement of viremia in patients with chronic hepatitis C or compensated cirrhosis type C in neither Serogroup 1 (genotype 1) nor Serogroup 2 (genotype 2) | Additional indication |
| <b>REBETOL</b>    | Ribavirin                                                                 | Manufacturer and distributor: MSD K. K                                                         | March 24, 2017     | \$4 (200mg/pill)                                                                          | Improvement of viremia in patients with chronic hepatitis C or compensated cirrhosis type C in neither Serogroup 1 (genotype 1) nor Serogroup 2 (genotype 2) | Additional indication |
| <b>OZEX</b>       | Tosufloxacin tosilate hydrate                                             | Manufacturer and distributor: Fujifilm Toyama Chemical                                         | March 2, 2017      | \$1.1 (60mg/pill)<br>\$0.5 (75mg/pill)<br>\$0.6 (150mg/pill)<br>\$1.2 (0.3%/ml eye-drops) | Treatment of mycoplasma pneumonia caused by Mycoplasma pneumoniae                                                                                            | Additional indication |
| <b>RIAMET</b>     | Artemether/Lumefantrine                                                   | Manufacturer and distributor: Novartis Pharma K. K                                             | December 19, 2016  | \$2/pill                                                                                  | Treatment of malaria                                                                                                                                         | New approval          |
| <b>VAXEM HIB</b>  | Hemophilus influenzae type b vaccine adsorbed                             | Manufacturer and distributor: Takeda Pharmaceutical                                            | December 19, 2016  | NA                                                                                        | Prophylaxis of Hemophilus influenzae type b infections                                                                                                       | Additional indication |
| <b>XIMENCY</b>    | Daclatasvir hydrochloride/ Asunaprevir/Beclabuvir hydrochloride           | Manufacturer and distributor: Bristol Myers Squibb                                             | December 19, 2016  | \$99/pill                                                                                 | Improvement of viremia in patients with chronic hepatitis C or compensated cirrhosis type C in serogroup 1 (genotype 1)                                      | New approval          |

|                                    |                                                                       |                                                                                                                                                       |                    |                                                   |                                                                                                                         |                       |
|------------------------------------|-----------------------------------------------------------------------|-------------------------------------------------------------------------------------------------------------------------------------------------------|--------------------|---------------------------------------------------|-------------------------------------------------------------------------------------------------------------------------|-----------------------|
| <b>DESCOVY</b>                     | Emtricitabine/ Tenofovir alafenamide fumarate                         | Manufacturer and distributor: Gilead Sciences                                                                                                         | December 9, 2016   | \$26/pill (LT)<br>\$37/pill (HT)                  | Treatment of HIV-1 infection                                                                                            | New approval          |
| <b>PREZCOBIX</b>                   | Darunavir ethanolate/ Cobicistat                                      | Manufacturer and distributor: Janssen Pharmaceutical K. K                                                                                             | November 22, 2016  | \$19                                              | Treatment of HIV infection                                                                                              | New approval          |
| <b>ERELSA</b>                      | Elbasvir                                                              | Manufacturer and distributor: MSD K. K                                                                                                                | September 28, 2016 | \$223 (50mg/pill)                                 | Improvement of viremia in patients with chronic hepatitis C or compensated cirrhosis type C in serogroup 1 (genotype 1) | New approval          |
| <b>VIEKIRAX</b>                    | Ombitasvir hydrate/ Paritaprevir hydrate/ Ritonavir                   | Manufacturer and distributor: AbbVie GK                                                                                                               | September 28, 2016 | \$204/pill                                        | Improvement of viremia in patients with chronic hepatitis C in serogroup 2 (genotype 2)                                 | Additional indication |
| <b>GRAZYNA</b>                     | Grazoprevir hydrate                                                   | Manufacturer and distributor: MSD K. K                                                                                                                | September 28, 2016 | \$80 (50mg/pill)                                  | Improvement of viremia in patients with chronic hepatitis C or compensated cirrhosis type C in serogroup 1 (genotype 1) | New approval          |
| <b>REBETOL</b>                     | Ribavirin                                                             | Manufacturer and distributor: MSD K. K                                                                                                                | September 28, 2016 | \$4 (200mg/capsule)                               | Improvement of viremia in patients with chronic hepatitis C in serogroup 2                                              | Additional indication |
| <b>INAVIR</b>                      | Laninamivir octanoate hydrate                                         | Manufacturer and distributor: Daiichi Sankyo                                                                                                          | August 26, 2016    | \$20 (20mg/inhalation kit)<br>\$39 (160mg/bottle) | Prophylaxis of influenza A or B virus infections                                                                        | Additional indication |
| <b>GENVOYA</b>                     | Elvitegravir/Cobicistat/ Emtricitabine/Tenofovir alafenamide fumarate | Manufacturer and distributor: Gilead Sciences                                                                                                         | June 17, 2016      | \$65/pill                                         | Treatment of HIV-1 infection                                                                                            | New approval          |
| <b>MALARONE</b>                    | Atovaquone/Proguanil hydrochloride                                    | Manufacturer and distributor: GlaxoSmithKline K. K                                                                                                    | March 28, 2016     | \$5/pill (adult)<br>\$2/pill (children)           | Treatment and prevention of malaria                                                                                     | Additional indication |
| <b>PRIMAQUINE</b>                  | Primaquine phosphate                                                  | Manufacturer and distributor: Sanofi S.A.                                                                                                             | March 28, 2016     | \$21 (15mg/pill)                                  | Treatment of malaria caused by Plasmodium vivax and P. ovale                                                            | New approval          |
| <b>BIKEN</b>                       | Freeze-dried live attenuated varicella vaccine                        | Manufacturer and distributor: The Research Foundation for Microbial Diseases of Osaka University<br>Distributor: Mitsubishi Tanabe Pharma Corporation | March 18, 2016     | NA                                                | Prevention of herpes zoster in individuals 50 years of age and older                                                    | Additional indication |
| <b>KITASATO<br/>DAIICHI SANKYO</b> | Adsorbed cell culture-derived influenza vaccine (H5N1)                | Manufacturer and distributor: Daiichi Sankyo<br>Distributor: Kitasato Pharmaceutical Industry                                                         | March 18, 2016     | NA                                                | Prevention of pandemic influenza (H5N1)                                                                                 | Additional indication |
| <b>TRIBIK</b>                      | Adsorbed diphtheria-purified pertussis-tetanus combined vaccine       | Manufacturer and distributor: The Research Foundation for Microbial Diseases of Osaka University<br>Distributor: Mitsubishi Tanabe Pharma Corporation | February 29, 2016  | NA                                                | Prevention of pertussis, diphtheria and tetanus                                                                         | Additional indication |
| <b>VAXEM HIB</b>                   | Hemophilus influenzae type b                                          | Manufacturer and distributor:                                                                                                                         | January 22,        | NA                                                | Prophylaxis of Hemophilus influenzae type b                                                                             | New approval          |

|                   |                                                                 |                                                                                                    |                    |                                                                                                                             |                                                                                                                                                                |                       |
|-------------------|-----------------------------------------------------------------|----------------------------------------------------------------------------------------------------|--------------------|-----------------------------------------------------------------------------------------------------------------------------|----------------------------------------------------------------------------------------------------------------------------------------------------------------|-----------------------|
|                   | vaccine absorbed                                                | Takeda Pharmaceutical                                                                              | 2016               |                                                                                                                             | infections                                                                                                                                                     |                       |
| <b>REMICADE</b>   | Infliximab                                                      | Manufacturer and distributor: Mitsubishi Tanabe Pharma Corporation<br>Distributor: Janssen Biotech | December 21, 2015  | \$648(100mg bottle)                                                                                                         | Treatment of acute-phase Kawasaki's disease in patients who have not responded sufficiently to conventional therapies                                          | Additional indication |
| <b>VIEKIRAX</b>   | Ombitasvir hydrate/Paritaprevir hydrate/Ritonavir               | Manufacturer and distributor: AbbVie GK                                                            | September 28, 2015 | \$204/pill                                                                                                                  | Improvement of viremia in patients with chronic hepatitis C or compensated cirrhosis type C in serogroup 1 (genotype 1)                                        | New approval          |
| <b>CIPROXAN</b>   | Ciprofloxacin                                                   | Manufacturer and distributor: Bayer Yakuhin                                                        | September 24, 2015 | \$0.3 (100mg/pill)<br>\$0.4 (200mg/pill)<br>\$17 (200mg/100ml)<br>\$21 (300mg/150ml)<br>\$19 (400mg/200ml)                  | Treatment of sepsis, pneumonia, etc.                                                                                                                           | Additional indication |
| <b>HARVONI</b>    | Ledipasvir acetate/Sofosbuvir                                   | Manufacturer and distributor: Gilead Sciences                                                      | July 3, 2015       | \$509/pill                                                                                                                  | Improvement of viremia in patients with chronic hepatitis C or compensated cirrhosis type C in serogroup 1 (genotype 1)                                        | New approval          |
| <b>DIFLUCAN</b>   | Fluconazole                                                     | Manufacturer and distributor: Pfizer                                                               | May 26, 2015       | \$3 (50mg capsule)<br>\$4 (100mg capsule)<br>\$17 (0.1% 50ml bottle)<br>\$22 (0.2% 50ml bottle)<br>\$36 (0.2% 100ml bottle) | Treatment of vaginitis and vulvovaginitis caused by Candida                                                                                                    | Additional indication |
| <b>ALDREB</b>     | Colistin sodium methanesulfonate                                | Manufacturer and distributor: GlaxoSmithKline K. K                                                 | March 26, 2015     | \$77 (150mg bottle)                                                                                                         | Treatment of infections caused by colistin-sensitive Escherichia coli, Citrobacter, Klebsiella, Enterobacter, Pseudomonas aeruginosa and Acinetobacter         | New approval          |
| <b>SYNFLORIX</b>  | Pneumococcal 10-valent conjugate vaccine adsorbed               | Manufacturer: GlaxoSmithKline K. K<br>Distributor: Daiichi Sankyo                                  | March 26, 2015     | NA                                                                                                                          | Prophylaxis of pneumonia and pneumococcal invasive diseases                                                                                                    | New approval          |
| <b>KAKETSUKEN</b> | Cell culture-derived influenza emulsion HA vaccines (prototype) | Manufacturer and distributor: The Chemo-Sero-Therapeutic Research Institute                        | March 26, 2015     | NA                                                                                                                          | Prevention of pandemic influenza                                                                                                                               | New approval          |
| <b>SOVALDI</b>    | Sofosbuvir                                                      | Manufacturer and distributor: Gilead Sciences                                                      | March 26, 2015     | \$395 (400mg pill)                                                                                                          | Improvement of viremia in patients with chronic hepatitis C or compensated cirrhosis type C in serogroup 2 (genotype 2)                                        | New approval          |
| <b>COPEGUS</b>    | Ribavirin                                                       | Manufacturer and distributor: Chugai Pharmaceutical                                                | March 26, 2015     | \$6 (200mg/pill)                                                                                                            | Improvement of viremia with the concomitant use of sofosbuvir in patients with chronic hepatitis C or compensated cirrhosis type C in serogroup 2 (genotype 2) | Additional indication |
| <b>DAKLINZA</b>   | Daclatasvir hydrochloride                                       | Manufacturer and distributor: Bristol Myers Squibb                                                 | March 20, 2015     | \$74 (60mg/pill)                                                                                                            | Improvement of viremia in patients with chronic hepatitis C or compensated cirrhosis type C in serogroup 1 (genotype 1)                                        | Changed approval      |
| <b>TRIUMEQ</b>    | Dolutegravir sodium, Abacavir sulfate, Lamivudine               | Manufacturer and distributor: ViiV Healthcare                                                      | March 16, 2015     | \$64/pill                                                                                                                   | Treatment of HIV infection                                                                                                                                     | New approval          |

|                     |                                                         |                                                                    |                  |                                                     |                                                                                                                                                                              |                       |
|---------------------|---------------------------------------------------------|--------------------------------------------------------------------|------------------|-----------------------------------------------------|------------------------------------------------------------------------------------------------------------------------------------------------------------------------------|-----------------------|
| <b>VENOGLOBULIN</b> | Polyethylene glycol treated human normal immunoglobulin | Manufacturer and distributor:<br>Japan Blood Products Organization | February 2, 2015 | \$347 (5g/100ml bottle)<br>\$702 (10g/200ml bottle) | Prevention of acute otitis media, acute bronchitis, or pneumonia caused by Pneumococcus or Hemophilus influenzae in patients associated with a decrease in serum IgG2 levels | Additional indication |
|---------------------|---------------------------------------------------------|--------------------------------------------------------------------|------------------|-----------------------------------------------------|------------------------------------------------------------------------------------------------------------------------------------------------------------------------------|-----------------------|

\*Price per drug was converted into US dollars using the 2019 average monthly exchange rates of ¥109.0 per \$1.

Price per drug was used as of February 19, 2022.

Drug price for vaccines was not determined and was open priced in Japan. So, it was not available.

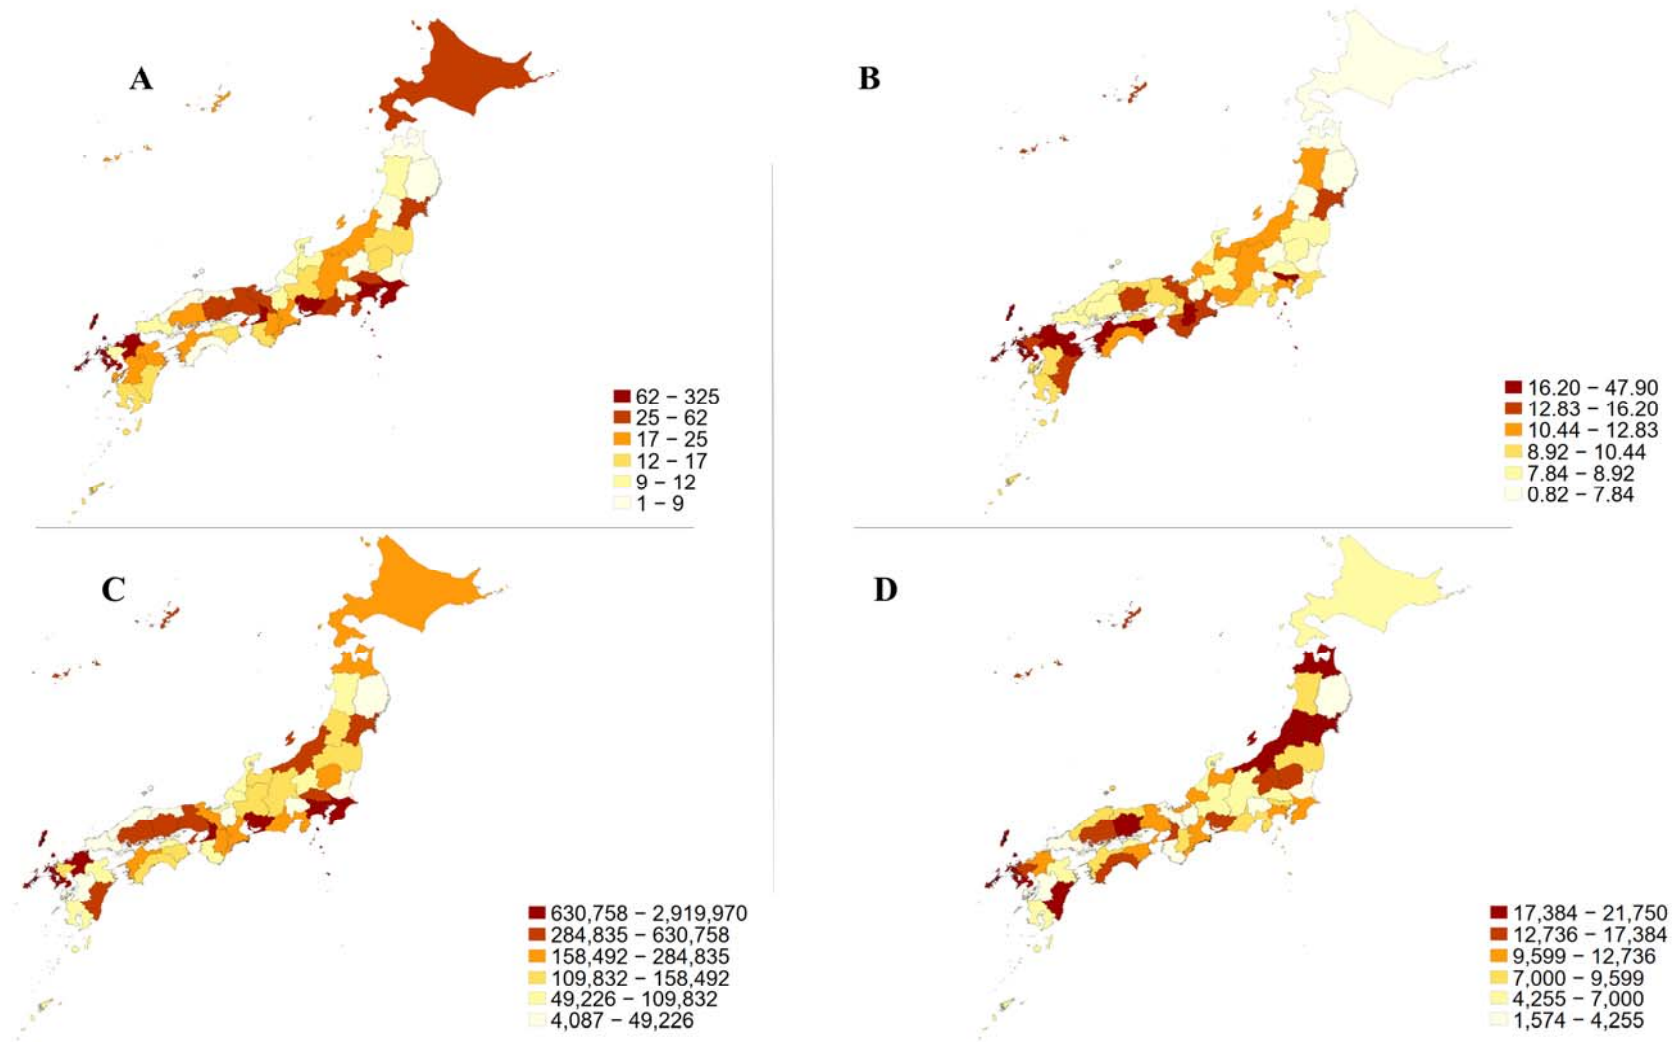

Supplemental Material 5. Geographical characteristics of payment distribution

5A: The number of infectious disease specialists in 2021; 5B: The number of infectious disease specialists per million population in 2021; 5C: total personal payment values to the infectious disease specialists from 2016 to 2019; 5D: average personal payment values per infectious disease specialist from 2016 to 2019

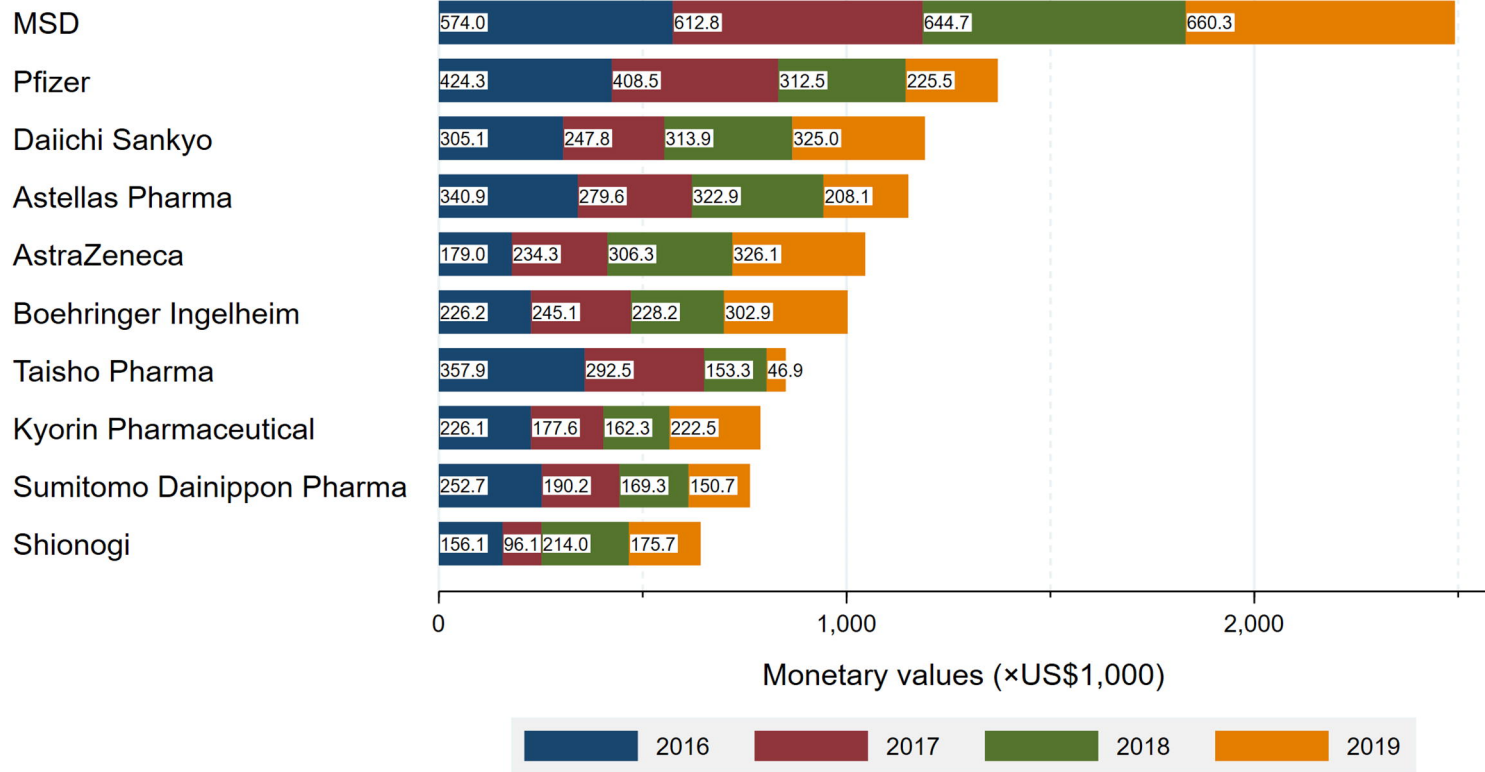

Source: http://medrxiv.stage.highwire.org/content/10.1101/2022.03.09.22271972v1.full.pdf
